# Supplementary material for: Epithelial-to-Mesenchymal Transition and Phenotypic Marker Evaluation in Human, Canine, and Feline Mammary Gland Tumors
Source: MDPI journal article supplement (doi:10.3390/ani13050878), 2023-02-28
Supplement: s1 [file s1]

Table S1. Immunohistochemical expression of estrogen (ER) and progesterone (PR) receptors and ERBB2 in the samples.

| Species      | Sample ID | ER (%) | PR (%) | ERBB2 |
|--------------|-----------|--------|--------|-------|
| HBC ER+      | 1         | 90     | 15     | 2+    |
| HBC ER+      | 2         | 90     | 90     | 1+    |
| HBC ER+      | 3         | 70     | 90     | 0     |
| HBC ER+      | 4         | 100    | 100    | 1+    |
| HBC ER+      | 5         | 90     | 50     | 1+    |
| HBC ER+      | 6         | 50     | 0      | 0     |
| HBC ER+      | 7         | 80     | 40     | 0     |
| HBC ER+      | 8         | 90     | 70     | 1+    |
| HBC ER+      | 9         | 90     | 90     | 1+    |
| HBC ER+      | 10        | 70     | 80     | 0     |
| HBC TNBC     | 11        | 0      | 0      | 0     |
| HBC TNBC     | 12        | 0      | 0      | 1+    |
| HBC TNBC     | 13        | 0      | 0      | 1+    |
| HBC TNBC     | 14        | 0      | 0      | 1+    |
| HBC TNBC     | 15        | 0      | 0      | 0     |
| HBC TNBC     | 16        | 0      | 0      | 0     |
| HBC TNBC     | 17        | 0      | 0      | 0     |
| HBC TNBC     | 18        | 0      | 0      | 0     |
| HBC TNBC     | 19        | 0      | 0      | 0     |
| HBC TNBC     | 20        | 0      | 0      | 0     |
| HBC TNBC     | 21        | 0      | 0      | 0     |
| CMT grade I  | 1         | 53     | NP     | 0     |
| CMT grade I  | 2         | 21     | NP     | 0     |
| CMT grade I  | 3         | 13     | NP     | 0     |
| CMT grade I  | 4         | 15     | NP     | 0     |
| CMT grade I  | 5         | 62     | NP     | 0     |
| CMT grade I  | 6         | 27     | NP     | 0     |
| CMT grade I  | 7         | 37     | NP     | 0     |
| CMT grade I  | 8         | 27     | NP     | 0     |
| CMT grade I  | 9         | 49     | NP     | 0     |
| CMT grade I  | 10        | 15     | NP     | 0     |
| CMT grade I  | 11        | 14     | NP     | 0     |
| CMT grade II | 12        | 2      | NP     | 0     |
| CMT grade II | 13        | 2      | NP     | 0     |
| CMT grade II | 14        | 7      | NP     | 0     |
| CMT grade II | 15        | 57     | NP     | 0     |
| CMT grade II | 16        | 3      | NP     | 0     |
| CMT grade II | 17        | 13     | NP     | 0     |
| CMT grade II | 18        | 9      | NP     | 0     |
| CMT grade II | 19        | 21     | NP     | 0     |
| CMT grade II | 20        | 23     | NP     | 0     |
| CMT grade II | 21        | 2      | NP     | 0     |
| CMT grade II | 22        | 5      | NP     | 0     |
| FMT          | 1         | 0      | 0      | 0     |
| FMT          | 2         | 0      | 0      | 0     |
| FMT          | 3         | 0      | 0      | 0     |
| FMT          | 4         | 0      | 0      | 0     |

|     |    |   |   |   |
|-----|----|---|---|---|
| FMT | 5  | 0 | 0 | 0 |
| FMT | 6  | 0 | 0 | 0 |
| FMT | 7  | 0 | 0 | 0 |
| FMT | 8  | 0 | 0 | 0 |
| FMT | 9  | 0 | 0 | 0 |
| FMT | 10 | 0 | 0 | 0 |
| FMT | 11 | 0 | 0 | 0 |
| FMT | 12 | 0 | 0 | 0 |

HBC, human breast cancer; CMT, canine mammary tumor; FMT, feline mammary tumor
